# Supplementary material for: Evolutionary development of redundant nuclear localization signals in the mRNA export factor NXF1
Source: PubMed Central journal article supplement — Mol Biol Cell. 2011 Dec 1;22(23):4657–68. doi: 10.1091/mbc.E11-03-0222 (PMC3226482; doi:10.1091/mbc.e11-03-0222), 2011-12-01

## **Supplementary Information:**

### **Evolutionary development of redundant nuclear localization signals in the mRNA export factor NXF1**

Zi Chao Zhang<sup>a</sup>, Neal Satterly<sup>b</sup>, Beatriz M.A. Fontoura<sup>b</sup> and Yuh Min Chook<sup>a</sup>

<sup>a</sup> Department of Pharmacology, <sup>b</sup> Department of Cell Biology, University of Texas Southwestern Medical Center at Dallas, Dallas, TX, USA.

**Table S1.** Binding affinity of *hsNXF1-N* fragments for Kap $\beta$ 2

| <b>Karyopherin</b> | <b><i>hsNXF1-N</i> fragments</b> | <b>K<sub>D</sub><sup>a</sup> (nM)</b> | <b><math>\Delta</math>H (kcal/mol)</b> | <b>T<math>\Delta</math>S<sup>b</sup> (kcal/mol/K)</b> |
|--------------------|----------------------------------|---------------------------------------|----------------------------------------|-------------------------------------------------------|
| Kap $\beta$ 2      | 1-109                            | 40 $\pm$ 13                           | -17.21 $\pm$ 1.25                      | -7.31 $\pm$ 1.42                                      |
|                    | 30-109                           | 91 $\pm$ 13                           | -18.51 $\pm$ 1.13                      | -9.16 $\pm$ 1.12                                      |
|                    | 1-92                             | 54 $\pm$ 4                            | -19.57 $\pm$ 0.05                      | -9.82 $\pm$ 0.03                                      |
|                    | 1-80                             | 109 $\pm$ 33                          | -17.74 $\pm$ 0.89                      | -8.40 $\pm$ 0.88                                      |
|                    | 30-80                            | 204 $\pm$ 29                          | -19.16 $\pm$ 1.31                      | -10.17 $\pm$ 1.40                                     |

<sup>a</sup> Stoichiometry = 0.9-1.1.

<sup>b</sup> T $\Delta$ S=  $\Delta$ H –  $\Delta$ G.

All experiments were performed 3-5 times ( $\pm$  standard deviation)

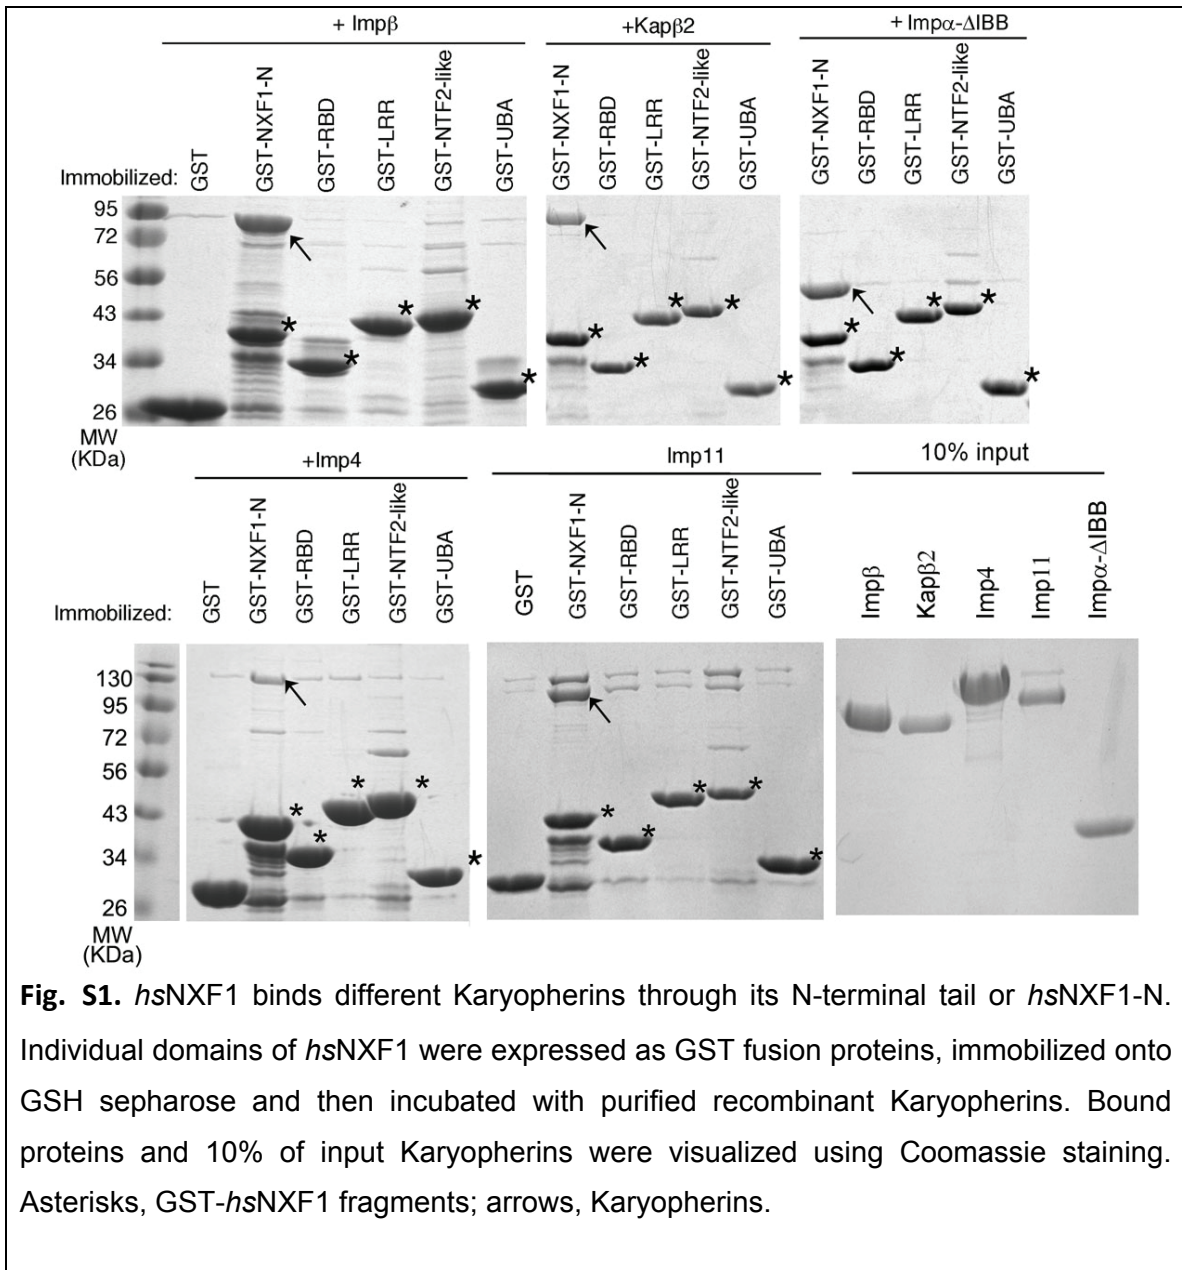

**Fig. S1.** *hsNXF1* binds different Karyopherins through its N-terminal tail or *hsNXF1-N*. Individual domains of *hsNXF1* were expressed as GST fusion proteins, immobilized onto GSH sepharose and then incubated with purified recombinant Karyopherins. Bound proteins and 10% of input Karyopherins were visualized using Coomassie staining. Asterisks, GST-*hsNXF1* fragments; arrows, Karyopherins.

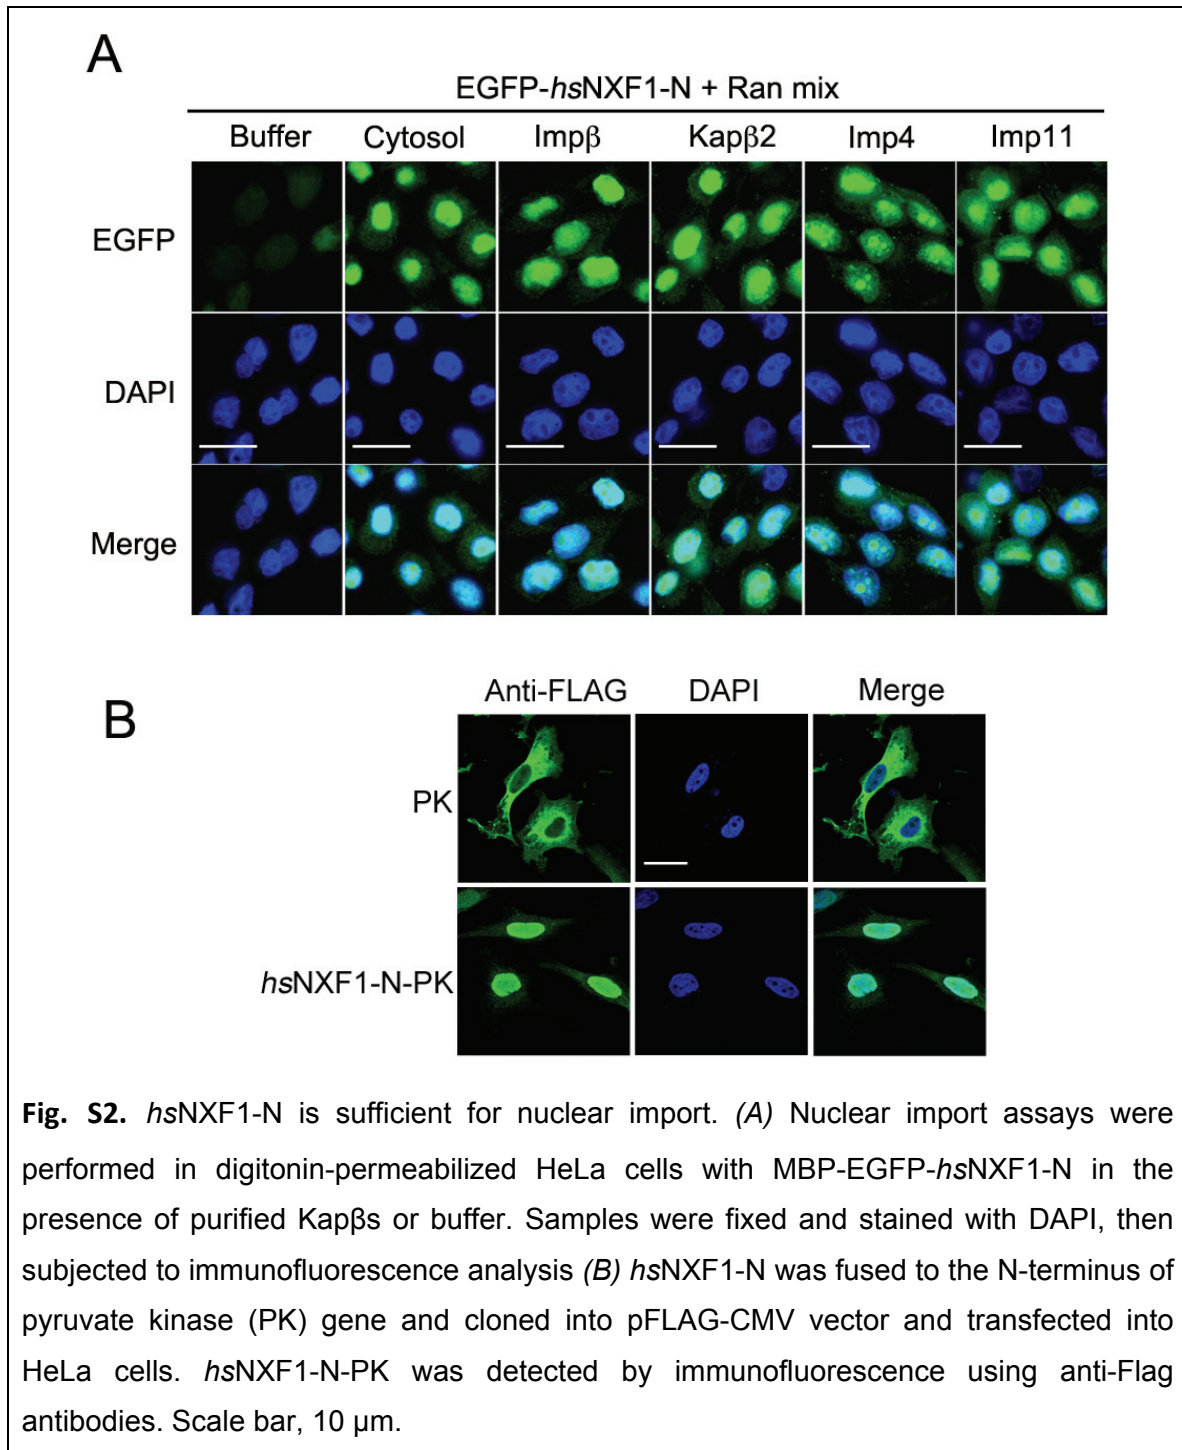

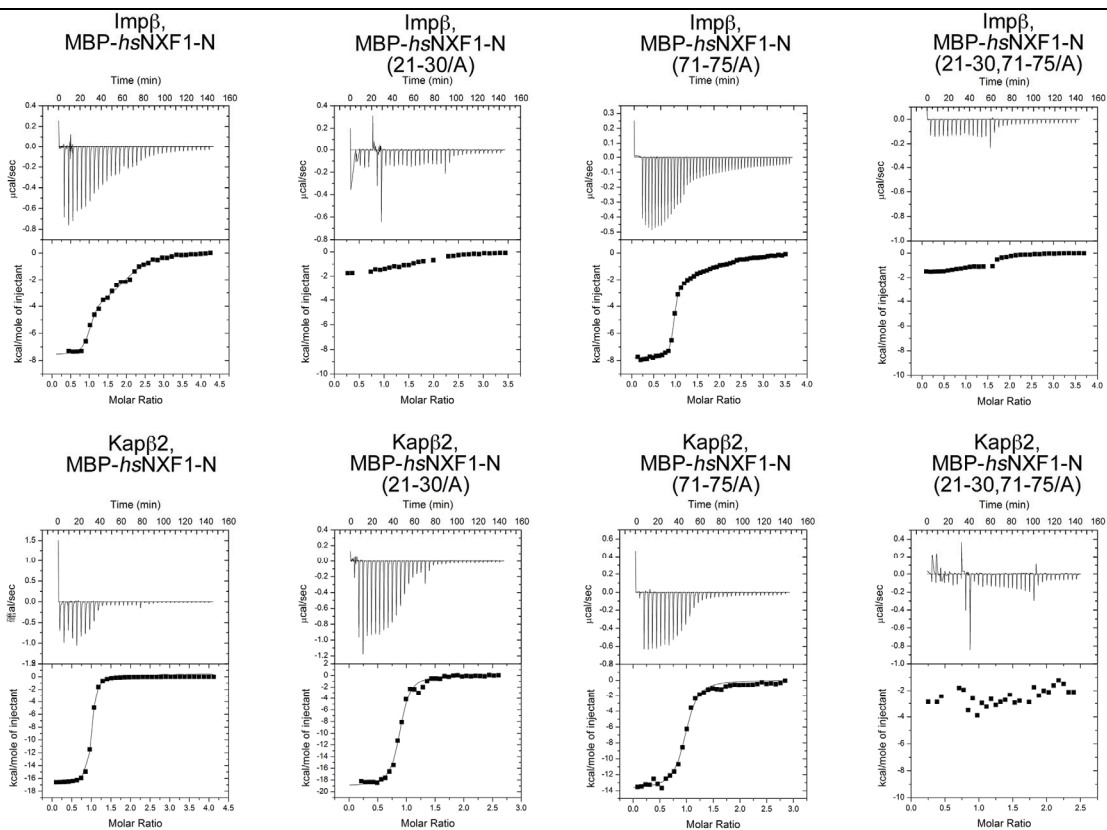

**Fig. S3.** Selected ITC measurements of MBP-*hsNXF1-N* proteins binding to Imp $\beta$  and Kap $\beta$ 2. After dialyzed against the same buffer, about 100–300  $\mu$ M MBP-*hsNXF1-N* proteins were titrated into a sample cell containing 10–20  $\mu$ M recombinant Imp $\beta$  or Kap $\beta$ 2 . The experiments were performed at 20°C with either 35 rounds of 8  $\mu$ l injections or 56 rounds of 6  $\mu$ l injections. Data were plotted and analyzed using MicroCal Origin software (version 7.0).

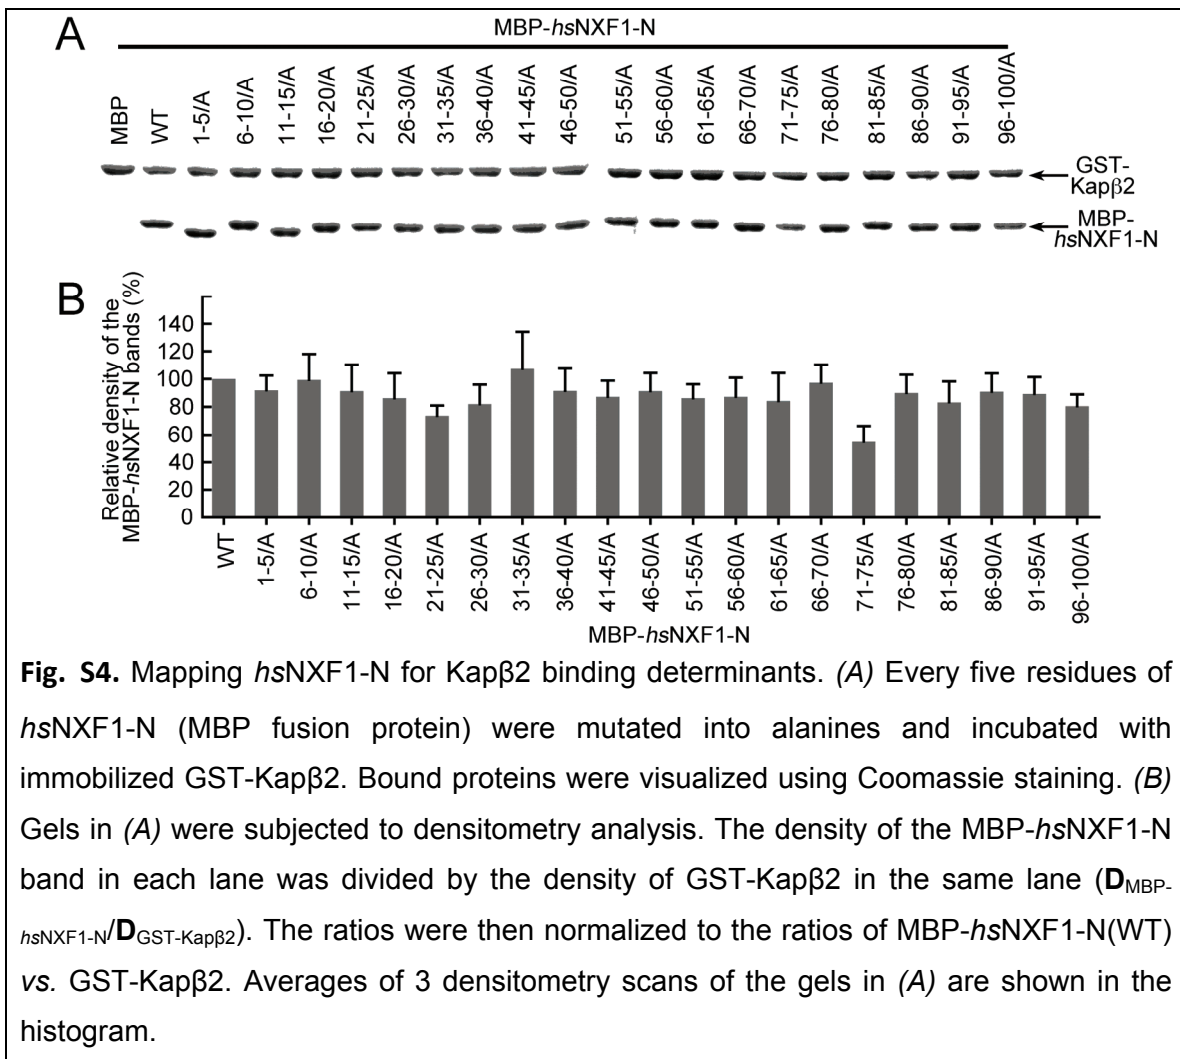

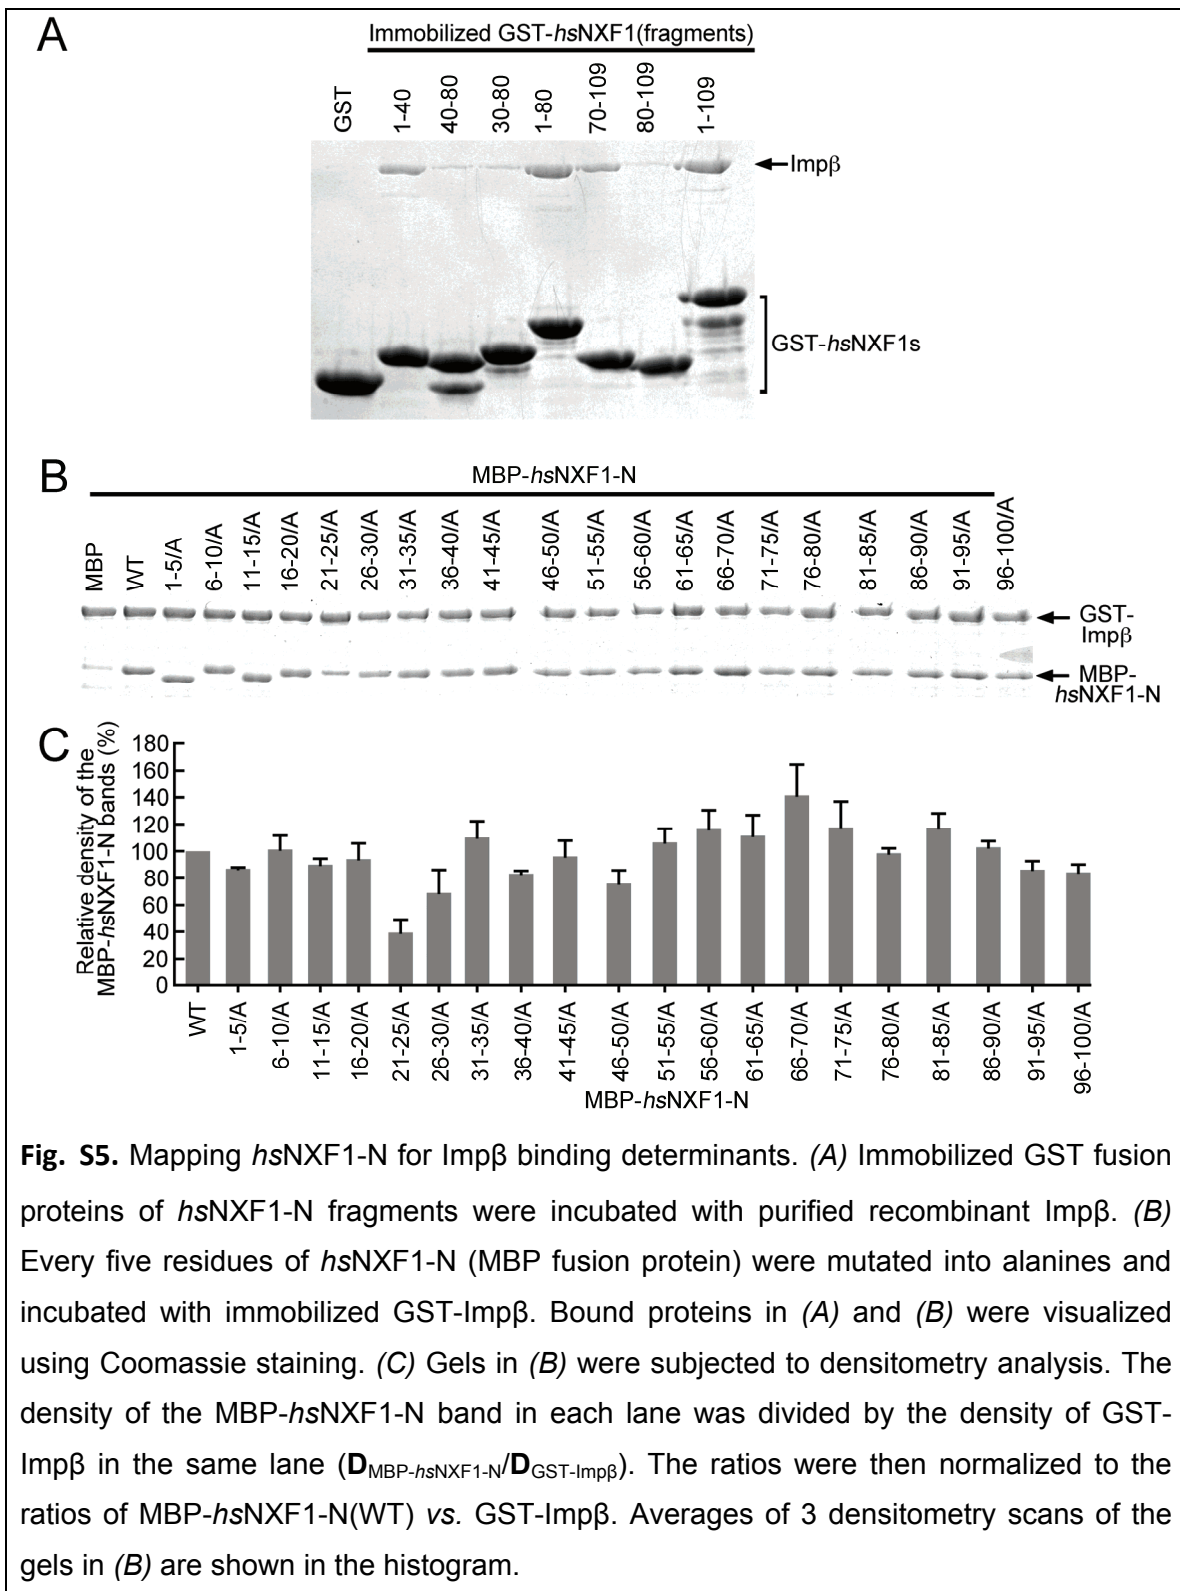

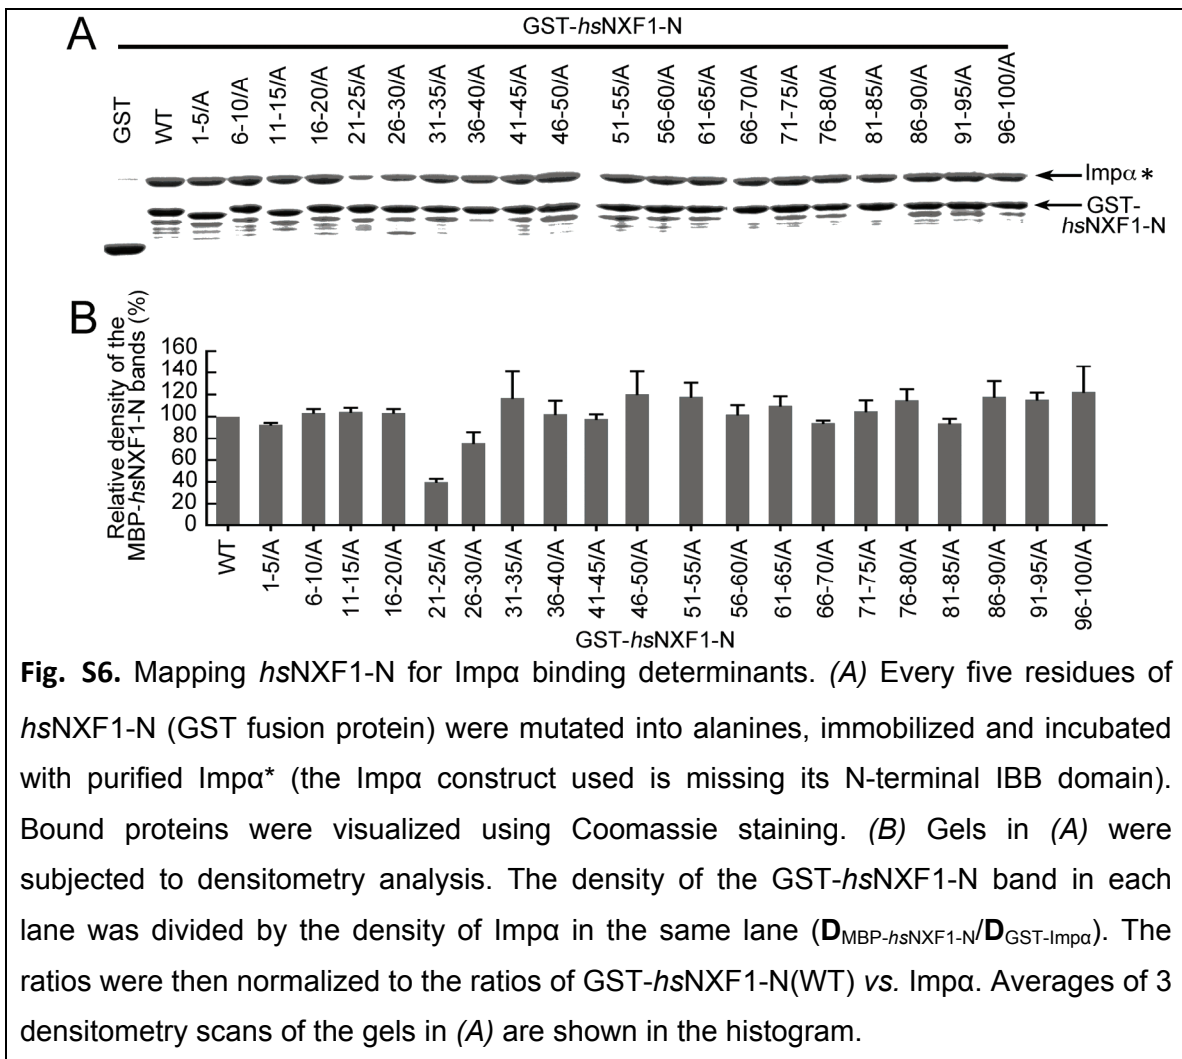



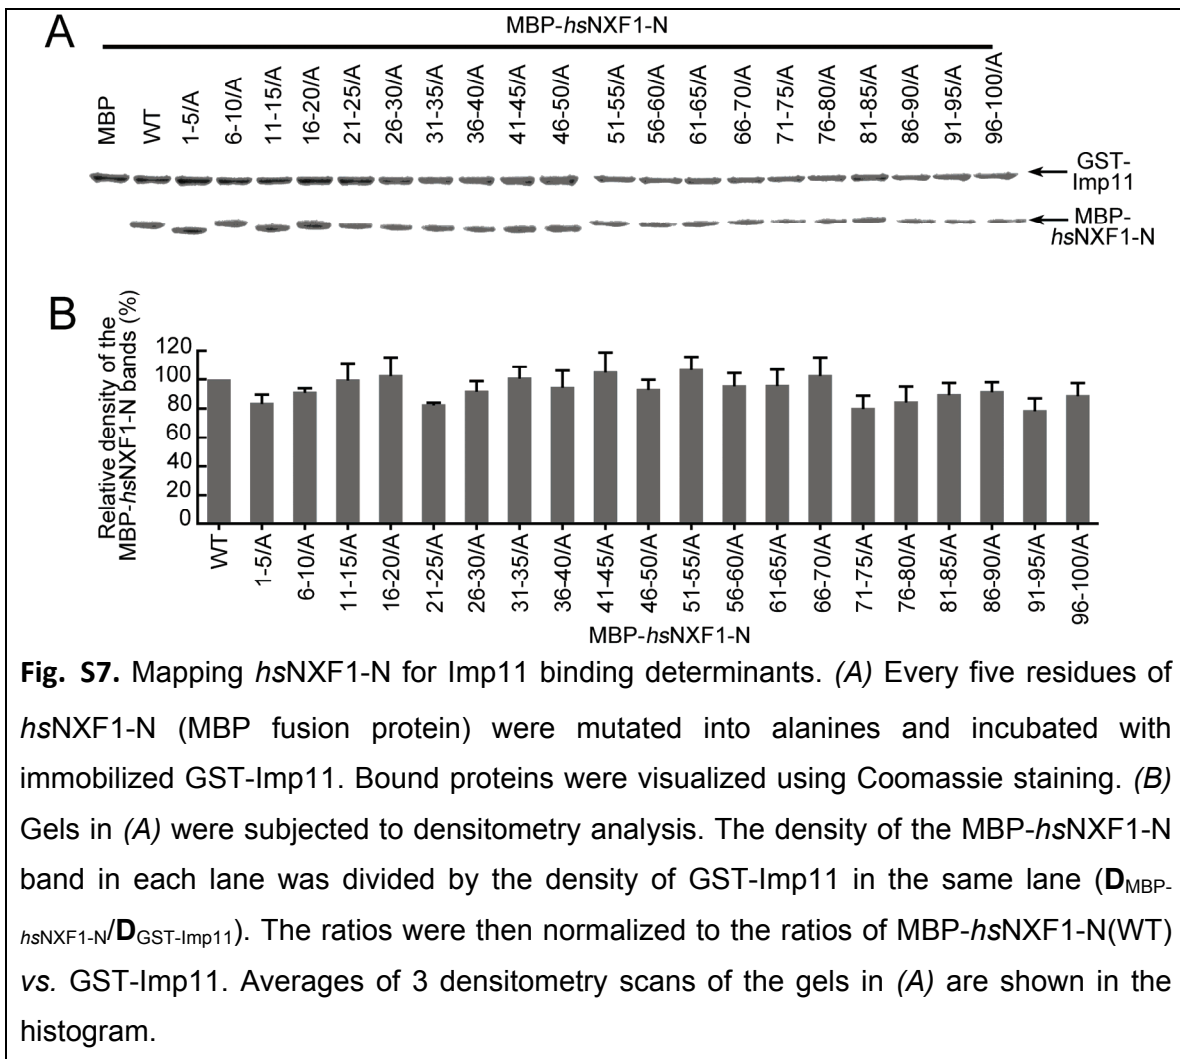

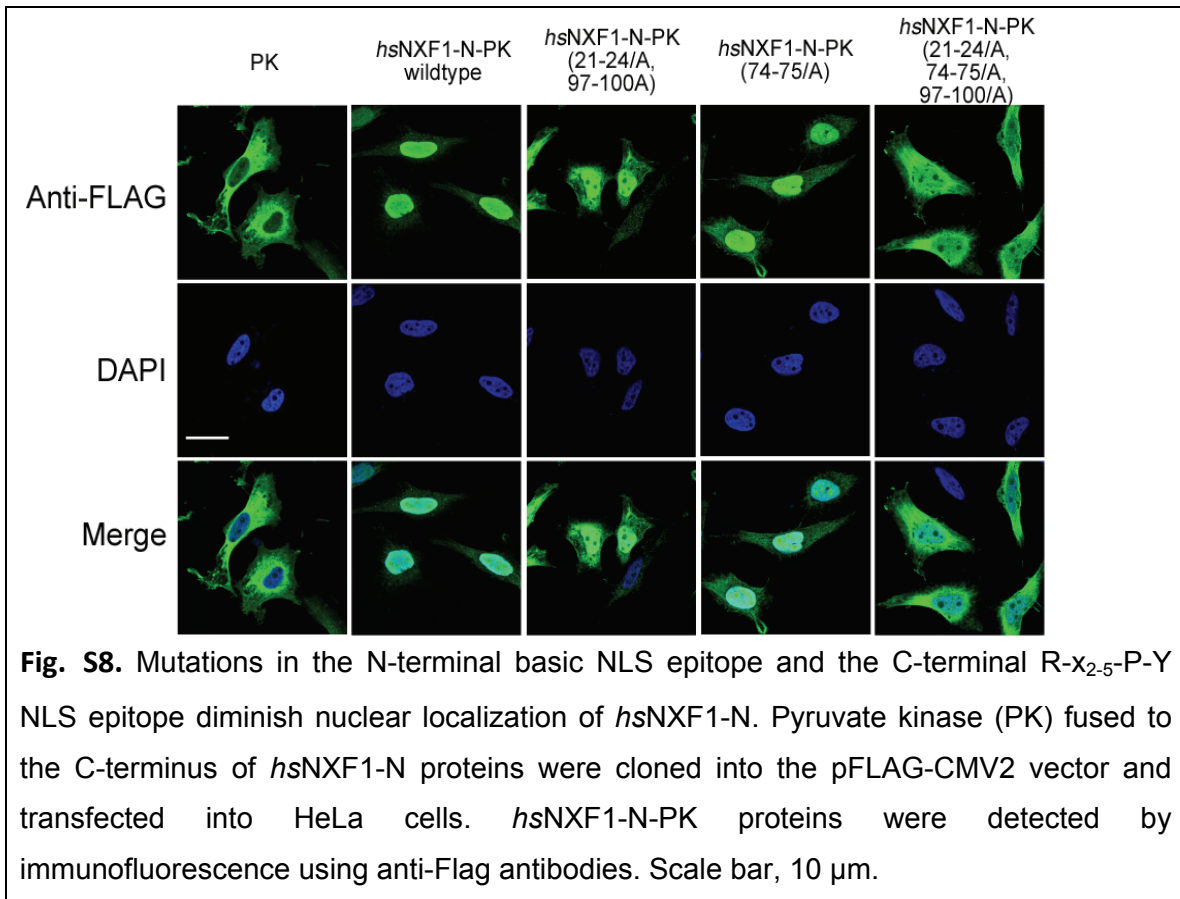

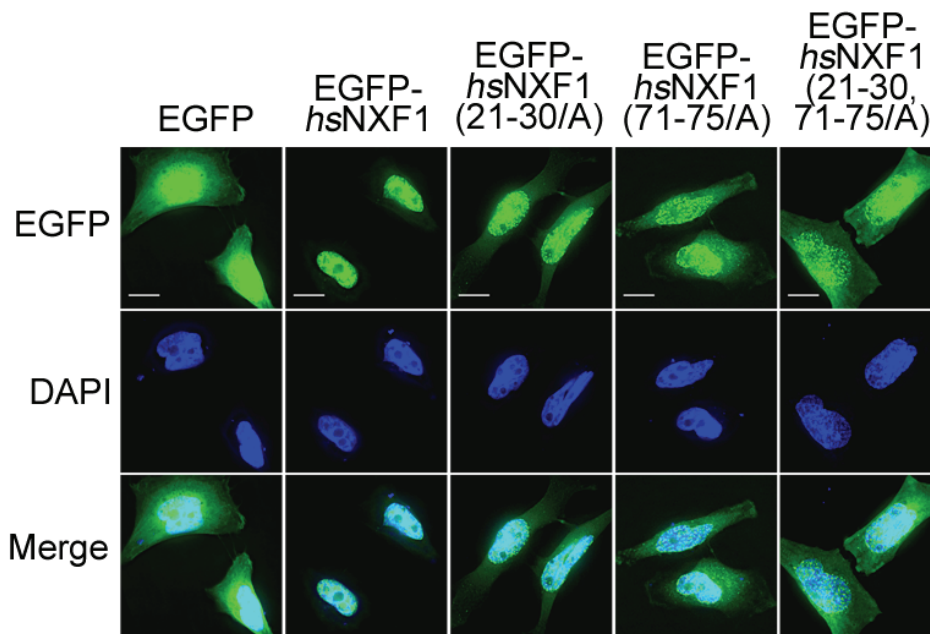

**Fig. S9.** NLS mutations impair nuclear localization of EGFP-*hsNXF1*. EGFP-*hsNXF1* and its NLS mutants were transfected into HeLa cells. Localization of EGFP fusion proteins were detected by deconvolution microscope. Scale bars, 10 $\mu$ m..

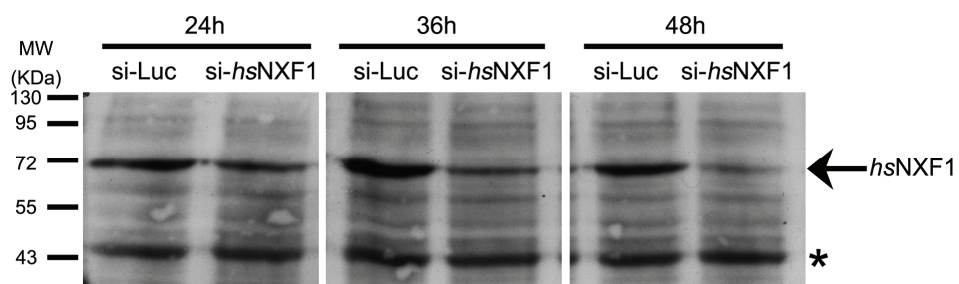

**Fig. S10.** Knockdown of endogenous *hsNXF1* by RNAi. Control siRNA targeting Luciferase and siRNA targeting *hsNXF1* were transfected into HeLa Tet-on cells in 6-well plates using Effectene. Cells were harvested after incubation at 37°C for 24, 36 and 48 hours. The expression levels of endogenous *hsNXF1* were detected by western blot using mouse anti-NXF1 antibody 53H8 and HRP labeled goat anti-mouse antibody. Asterisk, non-specific bands.

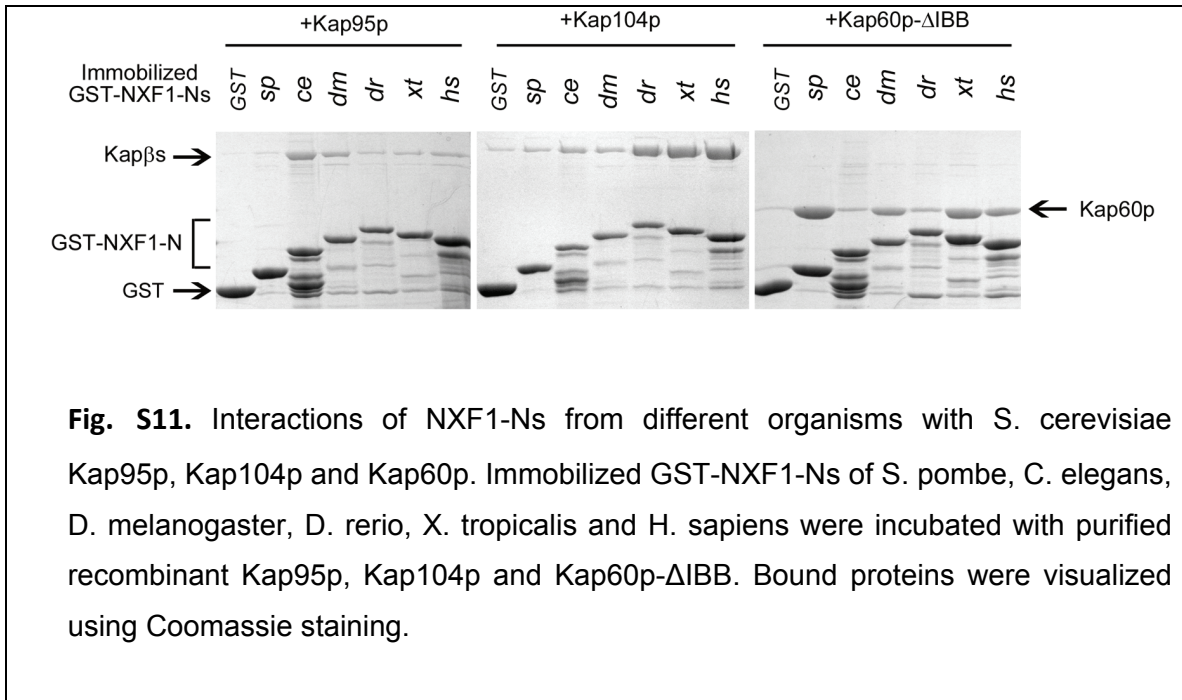

Supplement: supp_E11-03-0222_CombinedSupMats.pdf [file supp_E11-03-0222_CombinedSupMats.pdf]
